# Psychiatric risk gene *NT5C2* regulates protein translation in human neural progenitor cells

Rodrigo R.R. Duarte<sup>a,b</sup>, Nathaniel D. Bachtel<sup>c</sup>, Marie-Caroline Côté<sup>b,d</sup>, Sang H. Lee<sup>a</sup>, Sashika Selvackadunco<sup>e</sup>, Iain A. Watson<sup>b,d</sup>, Gary A. Hovsepian<sup>c</sup>, Claire Troakes<sup>e</sup>, Gerome D. Breen<sup>a</sup>, Douglas F. Nixon<sup>f</sup>, Robin M. Murray<sup>g</sup>, Nicholas J. Bray<sup>h</sup>, Ioannis Eleftherianos<sup>c</sup>, Anthony C. Vernon<sup>b,d</sup>, Timothy R. Powell<sup>#a</sup>, Deepak P. Srivastava<sup>#b,d</sup>

# Shared senior authors.

<sup>a</sup> MRC Social, Genetic & Developmental Psychiatry Centre, Institute of Psychiatry, Psychology & Neuroscience, King's College London, London, United Kingdom.

<sup>b</sup> Department of Basic & Clinical Neuroscience, Institute of Psychiatry, Psychology & Neuroscience, King's College London, London, United Kingdom.

<sup>c</sup> Department of Biological Sciences, Columbian College of Arts and Sciences, The George Washington University, Washington, District of Columbia, United States.

<sup>d</sup> MRC Centre for Neurodevelopmental Disorders, King's College London, London, United Kingdom.

<sup>e</sup> MRC London Neurodegenerative Diseases Brain Bank, Department of Basic & Clinical Neuroscience, Institute of Psychiatry, Psychology & Neuroscience, King's College London, London, United Kingdom.

<sup>f</sup> Division of Infectious Diseases, Weill Cornell Medicine, Cornell University, New York, New York, United States.

<sup>g</sup> Department of Psychosis Studies, Institute of Psychiatry, Psychology & Neuroscience, King's College London, London, United Kingdom.

25 <sup>h</sup> MRC Centre for Neuropsychiatric Genetics and Genomics, Cardiff University School of  
26 Medicine, Cardiff, United Kingdom.

27

28 Correspondence to: Dr Deepak P Srivastava, Maurice Wohl Clinical Neuroscience  
29 Institute, Institute of Psychiatry, Psychology & Neuroscience, King's College London,  
30 5 Cutcombe Road, London SE5 9RX, United Kingdom. E-mail:

31 [deepak.srivastava@kcl.ac.uk](mailto:deepak.srivastava@kcl.ac.uk). Tel: +44 (0)20 7848 5412. Fax: +44 (0)20 7848 5914.

32

33 **Running title:** Psychiatric risk gene NT5C2 regulates protein translation

34

35 **Keywords:** 5' AMP-activated protein kinase (AMPK); rpS6; drosophila melanogaster; post-  
36 mortem tissue, psychiatric disorders, GWAS, functional genetics, fruit fly, human neural  
37 progenitor cells, neurodevelopment.

38 **Abstract**

39 Genome-wide significant variants associated with combined risk for major psychiatric  
40 disorders on chromosome 10q24 affect the expression of the cytosolic 5'-nucleotidase II  
41 (*NT5C2*, *cN-II*) in population controls, implicating it as a psychiatric susceptibility gene. Risk  
42 alleles are associated with reduced expression of this gene in the developing and adult  
43 brain, but the resulting neurobiological risk mechanisms remain elusive. In this study, we  
44 provide further evidence for the association of *NT5C2* with psychiatric disorders, and use a  
45 functional genetics approach to gain a deeper understanding of the function of this risk gene  
46 in the nervous system. *NT5C2* expression was significantly reduced in the *post-mortem*  
47 brain of schizophrenia and bipolar disorder patients, and its protein predominately  
48 expressed in neurons within the adult brain. Using human neural progenitor cells (hNPCs),  
49 we found that *NT5C2* expression peaked at the neural progenitor state, where the encoded  
50 protein was ubiquitously distributed through the cell. *NT5C2* knockdown in hNPCs elicited  
51 transcriptomic changes associated with protein translation, that were accompanied by  
52 regulation of adenosine monophosphate-activated protein kinase (AMPK) signalling and  
53 ribosomal protein S6 (rpS6) activity. To identify the effect of reduced neuronal *NT5C2*  
54 expression at a systems level, we knockdown its homologue, *CG32549*, in *Drosophila*  
55 *melanogaster* CNS. This elicited impaired climbing behaviour in the model organism.  
56 Collectively, our data implicate *NT5C2* expression in risk for psychiatric disorders and in  
57 *Drosophila melanogaster* motility, and further suggest that risk is mediated via regulation of  
58 AMPK signalling and protein translation during early neurodevelopment.

59

60

61

## 62 **Introduction**

63 Genetic variants on chromosome 10q24 are associated with combined risk for  
64 schizophrenia, bipolar disorder, major depression, autism, and attention deficit hyperactivity  
65 disorder<sup>1</sup>, and constitute the third top association signal in the latest schizophrenia genome-  
66 wide association study (GWAS)<sup>2</sup>. Previous work from our group has demonstrated that the  
67 psychiatric risk variants at this locus exert *cis*-regulatory effects on the cytosolic 5'-  
68 nucleotidase II gene (*NT5C2*, *cN-II*) in population controls, reducing expression of this gene  
69 in the adult and developing brain<sup>3</sup>. However, the neurobiological mechanisms through which  
70 genetic variation at the *NT5C2* locus may increase risk for psychiatric conditions remain  
71 elusive. Interestingly, *NT5C2* has also been implicated in a myriad of other medical  
72 conditions, including intellectual disability<sup>4</sup>, Parkinson's disease<sup>5</sup>, spastic paraplegia<sup>6</sup>,  
73 cardiovascular disease<sup>7, 8</sup>, and acute lymphoblastic leukaemia<sup>9</sup>, which suggests that *NT5C2*  
74 may regulate fundamental aspects of cell biology that are ultimately dysregulated in these  
75 conditions.

76

77 The *NT5C2* gene produces an enzyme that cleaves inorganic phosphate from purine and  
78 purine-derived nucleotides such as adenosine, inosine and guanosine monophosphate  
79 (AMP, IMP, and GMP, respectively)<sup>10</sup>, or that catalyses the transfer of phosphate groups  
80 between purine nucleotides and nucleosides<sup>11</sup>. Purinergic compounds have been shown to  
81 regulate cell cycle progression and to act as neurotransmitters, and neurotrophic or  
82 neuroprotective agents<sup>12, 13</sup>, which is unsurprising given their role in fundamental metabolic  
83 processes such as DNA replication, gene transcription and protein synthesis<sup>14, 15</sup>.  
84 Interestingly, a purinergic hypothesis of schizophrenia has been proposed, which explains  
85 neurodevelopmental and neurochemical aspects of this disorder<sup>16</sup>. One plausible  
86 mechanism via which *NT5C2* may regulate such pivotal processes is via *adenosine*  
87 *monophosphate-activated protein kinase* (AMPK) signalling, which is a major regulator of

88 cellular energy homeostasis<sup>17-19</sup>. It remains unclear, however, whether this mechanism  
89 occurs in the context of the nervous system, or the cell types involved.

90

91 The present work provides the most in-depth characterisation of the distribution, expression  
92 and function of *NT5C2* in the brain and in cultures of human neural progenitor cells (hNPCs).  
93 First, to confirm that *NT5C2* is a psychiatric risk gene, we explore its expression in RNA  
94 sequencing (RNA-seq) data from the brain of schizophrenia, major depression and bipolar  
95 disorder patients. This analysis revealed that *NT5C2* expression is significantly reduced in  
96 schizophrenia and bipolar disorder patients relative to unaffected controls. We also used  
97 *post-mortem* human brain tissue to identify the major cell types expressing *NT5C2* in the  
98 adult brain, revealing this protein is more expressed in neurons relative to glial cells. To gain  
99 insight into the molecular mechanisms that this gene influences, we investigated the  
100 expression, sub-cellular distribution and function of *NT5C2* in hNPCs. This revealed that the  
101 gene is highly expressed during neurodevelopment and that the *NT5C2* protein is  
102 ubiquitously distributed in the soma and cellular processes of neural progenitors. Using an  
103 RNA interference-mediated approach (RNAi), reduced expression of *NT5C2* in hNPCs  
104 elicited transcriptomic changes associated with protein translation regulation, which were  
105 accompanied by differential regulation of AMPK signalling and ribosomal protein S6 (rpS6)  
106 activity. Finally, to elucidate the impact of reduced *NT5C2* expression at a systems level, we  
107 utilised a *Drosophila melanogaster* (*D. melanogaster*) model in which the fly homologue of  
108 *NT5C2*, *CG32549*, was knocked-down either ubiquitously or specifically within the nervous  
109 system. Collectively, our work describes the hitherto unknown pattern of *NT5C2* distribution  
110 and expression in the adult brain and hNPCs, implicating it in the regulation of AMPK  
111 signalling and protein translation.

112

113

## 114 **Materials and Methods**

115 See Supplementary Information for further details on Materials and Methods.

116

### 117 ***Brain samples***

118 To identify cell-type specific expression of *NT5C2* in the adult brain, we obtained samples  
119 from unaffected controls from the Medical Research Council London Neurodegenerative  
120 Disease Brain Bank, at the Institute of Psychiatry, Psychology & Neuroscience, King's  
121 College London, under the license of the United Kingdom Human Tissue Authority (ref.  
122 12293). Demographics of the *post-mortem* samples is available in the Supplementary  
123 Information.

124

### 125 ***RNA-sequencing analysis***

126 To study expression of *NT5C2* in the brain of psychiatric patients, we analysed RNA-seq  
127 data from the Stanley Neuropathology Consortium<sup>20</sup>. This cohort consisted of a collection of  
128 matched hippocampus samples from subjects diagnosed with bipolar disorder,  
129 schizophrenia, or major depression, and unaffected controls (n = 15 each). Reads were  
130 trimmed using Trimmomatic 0.36<sup>21</sup>, and mapped to Ensembl genes (build 38, v93) using  
131 kallisto<sup>22</sup>. Differential expression was calculated using Wald tests in DESeq2<sup>23</sup> whilst  
132 controlling for the effect of demographics, and corrected using a false discovery rate (FDR)  
133 cut-off of 10% ( $q < .10$ ). Raw and normalised counts, and factors and covariates considered  
134 in the analysis are available in **Supplementary Tables 1-3**. Raw RNA-seq data is available  
135 upon request via <http://sncid.stanleyresearch.org>.

136

### 137 ***Immunohisto- and cytochemistry***

138 We used immunolabelling to quantify the *NT5C2* knockdown in hNPCs and identify its sub-  
139 cellular distribution in hNPCs and brain tissue. Brain sections were deparaffinised and

140 submitted to antigen retrieval and autofluorescence removal protocols (please see  
141 Supplementary Information for more information). Brain sections and cell cultures were  
142 permeabilised and blocked and incubated with the following primary antibodies: NT5C2  
143 (M02-3C1) (Abnova, Taipei, Taiwan), IBA1 (Menarini Diagnostics, Warrington, United  
144 Kingdom), GFAP (Dako Agilent, Santa Clara, United States), MAP2, Parvalbumin and Beta-  
145 III-Tubulin (Abcam, Cambridge, United Kingdom). Fluorescently labelled secondary  
146 antibodies included Goat Alexa 488, 568 or 633 antibodies (Thermo Fisher Scientific).

147

### 148 **Cell lines**

149 To identify the distribution and function of *NT5C2 in vitro*, we analysed hNPCs from the  
150 CTX0E16 neural stem cell line<sup>24</sup> or from human induced pluripotent stem cells (hiPSCs)  
151 from an unaffected control<sup>25</sup>, and human embryonic kidney cells 293T (HEK293T). The  
152 CTX0E16 neural cell line<sup>24</sup> was obtained from ReNeuron Ltd. under a Material Transfer  
153 Agreement. Cells were derived and maintained as described in the Supplementary  
154 Information and elsewhere<sup>24, 25</sup>.

155

### 156 **RNA and protein isolation and quantification**

157 To identify gene and protein expression and phosphorylation differences associated with  
158 *NT5C2* function, we isolated total RNA or protein from *in vitro* cultures using TRI Reagent  
159 (Thermo Fisher Scientific, Waltham, Massachusetts, United States) or RIPA Buffer  
160 supplemented with Halt Protease and Phosphatase Inhibitor Cocktail (Thermo Fisher  
161 Scientific), respectively. Details on reverse transcriptase quantitative polymerase chain  
162 reaction (RT-qPCR), quality control and western blotting are available in the Supplementary  
163 Information. Primary antibodies for western blotting included: AMPK-alpha (D6) and  
164 phospho-AMPK-alpha (Thr172) (Santa Cruz Biotechnology, Dallas, Texas, United States),

165 and total rpS6 (54d2) and phospho-rpS6 (Ser235/Ser236) (Cell Signalling, Danvers,  
166 Massachusetts, United States).

167

### 168 **Confocal microscopy**

169 We imaged fluorescently labelled cultures or brain sections using confocal microscopy to  
170 identify the distribution of NT5C2 in the adult brain, and the sub-cellular distribution of this  
171 protein in hNPCs. Imaging was performed at the Wohl Cellular Imaging Centre, King's  
172 College London, using a Nikon A1R (Nikon, Amsterdam, Netherlands) or a Leica SP5  
173 Confocal Microscope (Leica, Wetzlar, Germany). Images were taken as z-stacks of 8-10  
174 plans, and exported to Fiji, where background subtracted images and maximum intensity  
175 projections were generated. To identify cell-type expression of *NT5C2* in the brain, co-  
176 localisation was defined as percentage of co-localised clusters relative to total number of  
177 clusters detected per image. High throughput analysis was performed using an ImageJ  
178 macro<sup>26</sup> previously used for co-localisation investigations<sup>27</sup> (n = 4 control subjects, 3  
179 technical replicates per antibody combination, 20 fields of view (FOV) each). A detailed  
180 summary of this macro can be found in Supplemental Information. To quantify the  
181 knockdown in hNPCs, regions of interest (ROI) were defined based on beta-3-tubulin  
182 expression, and NT5C2 corrected total cell fluorescence (CTCF) values were calculated as:  
183  $CTCF = \text{integrated density} - (\text{area} \times \text{mean fluorescence of three background readings})$  (n =  
184 4 biological replicates per condition, 4 FOV each).

185

### 186 **Microarray analysis**

187 A microarray analysis was performed to characterise the transcriptomic changes associated  
188 with the *NT5C2* knockdown in hNPCs. Samples were analysed at the Institute of Psychiatry,  
189 Psychology & Neuroscience BRC Genomics & Biomarker Core Facility, King's College  
190 London, using Human HT12 v4 BeadChip arrays (Illumina, Cambridge, Cambridgeshire,



191 UK). A linear regression model was used to quantify gene expression differences between  
192 conditions, whilst controlling for the effect of confounders such as biological replicate and  
193 microarray batch. The expression data were deposited in GEO under accession code  
194 GSE109240. Enrichment for Gene ontology (GO) terms was calculated against the  
195 background of all genes in the genome using GeneMania<sup>28</sup>.

196

### 197 ***Fly stocks and motility test***

198 To test the role of *NT5C2* in psychomotor behaviour in *D. melanogaster*, the *D.*  
199 *melanogaster* homologue of *NT5C2*, homologue *CG32549*, was knocked down by crossing  
200 the *CG32549*-RNAi line (v30079) with fly lines containing Gal4-driven promoters of genes  
201 that are ubiquitously expressed (*ACT5C*: BL4414), neuronal-specific (*ELAV*: BL8765), or  
202 gut-specific (*GUT*: DGRC113094). Negative geotaxis was used to calculate climbing  
203 success and assess psychomotor behaviour, as previously described<sup>29</sup>. Survivorship was  
204 determined 17-20 days post eclosure, as the number of flies alive out of the initial 20 flies  
205 allocated per tube.

206

### 207 ***Statistical analysis***

208 To identify differences between more than two independent groups, we used one-way  
209 ANOVAs followed by Tukey post hoc tests if values were normally distributed (e.g. co-  
210 localisation between *NT5C2* and different markers, or the effect of two independent siRNAs  
211 in hNPCs relative to control cultures); or Kruskal-Wallis tests followed by Dunn's post hoc  
212 tests, if values were not normally distributed (e.g.: the effect of the knockdowns on total and  
213 phosphorylated levels of AMPK and rpS6). To compare differences between two groups, we  
214 performed t-tests if values were normally distributed (e.g. expression differences between  
215 hNPCs and cultures, the effect of the knockdown or overexpression in hNPCs or HEK293T);  
216 or Mann-Whitney tests if they were not normally distributed (e.g. survival and climbing

217 success ratios associated with *CG32549* knockdowns in *Drosophila*); correction for multiple  
218 testing was performed using the Bonferroni method. The Fisher's exact test to calculate  
219 significance of the gene overlaps was performed in R using the package 'GeneOverlap'.  
220 Statistical analyses were performed in R or in IBM SPSS.

221

## 222 **Results**

### 223 ***NT5C2* expression is reduced in the brain of schizophrenia and bipolar disorder** 224 **patients**

225 We previously demonstrated that *NT5C2* expression is reduced in the brain of unaffected  
226 controls due to cis-regulatory effects associated with psychiatric risk alleles located on  
227 chromosome 10q24<sup>3</sup>. To study the expression of this gene in a psychiatric cohort, we  
228 analysed RNA-sequencing (RNA-seq) data from the hippocampus of patients diagnosed  
229 with bipolar disorder (BD), major depression (MDD), or schizophrenia (SCZ), and unaffected  
230 controls. We assessed gene expression differences associated with case-control status  
231 (**Supplementary Tables 4-6**) whilst controlling for potential confounding effects of  
232 demographics (**Supplementary Tables 7-12**). This analysis revealed that *NT5C2* was less  
233 expressed in SCZ ( $P < .001$ , false discovery rate (FDR) corrected  $P = .01$ , fold-change =  
234 0.56) and BD patients ( $P < .001$ , corrected  $P = .02$ , fold-change = 0.69), but not in MDD  
235 patients ( $P > .05$ ) (**Figure 1A**). These findings corroborate a role for *NT5C2* in mediating  
236 susceptibility to psychiatric disorders, particularly those associated with psychotic features.

237

### 238 **Expression of *NT5C2* is enriched in neurons relative to glial cells in the adult brain**

239 To understand how genetic variation affecting *NT5C2* expression may confer risk for  
240 psychiatric disorders, we investigated which neuronal cell types expressed this gene. First,  
241 we examined single-cell RNA-seq data from the mouse cortex<sup>30</sup> to predict which cell type(s)  
242 highly expressed *NT5C2*. This analysis revealed a significant difference in the cell-type

243 specific expression of *NT5C2* within neuronal and non-neuronal cells (One-way ANOVA,  $F$   
244  $(3, 1008) = 11.11, P < .001$ ). Post-hoc analysis confirmed that *NT5C2* is more abundant in  
245 neurons and interneurons than astrocytes (Tukey post hoc tests:  $P < .001$  for all  
246 comparisons; **Supplementary Figure 1**).

247

248 To investigate whether this distribution pattern also occurs in humans, we performed a  
249 series of immunocolocalisation experiments using autopsy brain tissue and confocal  
250 microscopy. We confirmed specificity of an antibody raised against *NT5C2* by using it to  
251 probe a gain-of-function in human embryonic kidney cells 293T (HEK293T) and CTX0E16  
252 hNPCs (**Supplementary Figures 2 and 4**), and loss-of-function in hNPCs (**Figures 3C and**  
253 **D**). We next analysed the distribution of *NT5C2* in the prefrontal cortex of *post-mortem* brain  
254 using standard immunoperoxidase staining with DAB as the chromogen (**Supplementary**  
255 **Figure 3**). A qualitative analysis of *NT5C2*-positive immunostaining with Nissl counter-stain  
256 to reveal cellular morphology suggested that *NT5C2* was present in neurons, glia and the  
257 surrounding neuropil (**Supplementary Figure 3**). However, we noted that not all putative  
258 glial cells expressed *NT5C2* (red arrows; **Supplementary Figure 3**). Therefore, to confirm  
259 this, we quantified the cell type-specific expression of *NT5C2* by measuring the co-  
260 localisation of this protein with markers of mature neurons (microtubule-associated protein  
261 2, MAP2), a sub-class of gamma-amino butyric acid (GABA) interneurons (parvalbumin,  
262 PARVALB), astrocytes (glial fibrillary acidic protein, GFAP), and microglia (ionized calcium-  
263 binding adapter molecule 1, IBA1; **Figures 1B-F**). We included PARVALB on the basis of  
264 the wealth of complementary lines of evidence implicating these cells in the pathophysiology  
265 of psychiatric disorders<sup>31</sup>. This analysis revealed a significant difference in the specific co-  
266 localisation of *NT5C2* with each of these markers (One-way ANOVA,  $F(3,44) = 39.12, P <$   
267  $.001, n = 4$  control subjects). Post-hoc analysis confirmed that the mean percentage co-  
268 localisation values significantly differed between neuronal and non-neuronal markers

269 (MAP2: 7.48%  $\pm$  2.02 (standard deviation); PARVALB: 6.89%  $\pm$  2.09; GFAP: 3.13%  $\pm$  1.09;  
270 IBA1: 1.44%  $\pm$  0.93; Tukey post hoc tests:  $P < .001$  for all comparisons; **Figure 1F**), but not  
271 within these categories (i.e., GFAP vs. IBA1,  $P > .05$ ). These data corroborate the single-  
272 cell RNA-seq data from the mouse brain (**Supplementary Figure 1**), and confirm our  
273 qualitative observations using immunoperoxidase staining (**Supplementary Figure 3**).  
274 Overall, these data suggest that whilst *NT5C2* expression at the message and protein level  
275 is found in both neurons and glial cells, it is clearly enriched in neurons relative to glia. This  
276 is consistent with the recent observation that there is an enrichment for expression of  
277 psychiatric risk genes in neuronal cells<sup>32</sup>.

278

### 279 ***NT5C2 is highly expressed and ubiquitously distributed in hNPCs***

280 The role of *NT5C2* in psychiatric disorders commence during neurodevelopment<sup>3</sup>, a period  
281 underscored by a large number of concurrent and ongoing complex process, implicated in  
282 all major psychiatric disorders. Indeed, assessment of the Human Brain Transcriptome  
283 Atlas<sup>33</sup> (**Figure 2A**) has identified that *NT5C2* expression peaks during this period. Thus, to  
284 investigate *NT5C2* function in neurodevelopment, we explored the sub-cellular distribution  
285 and molecular function of this gene in hNPCs. First, we characterise expression of *NT5C2*  
286 RefSeq transcripts NM\_012229 and NM\_001134373 in hNPCs from the CTX0E16 neural  
287 progenitor cell line and neurons terminally differentiated for 28 days (DD28)<sup>24</sup>. At this stage,  
288 terminally differentiated CTX0E16 cultures mainly comprise of neurons (~80%) and glial  
289 cells (~10%)<sup>24</sup>. This analysis revealed that both *NT5C2* transcripts were expressed ~30%  
290 higher in hNPCs compared to DD28 neurons on average. Although peak expression was  
291 observed in hNPCs, both transcripts displayed persistent expression at moderate to high  
292 levels in DD28 cultures (**Figure 2B**), indicating that *NT5C2* may also play a role in immature  
293 neurons. These data are consistent with a psychiatric risk mechanism mediated by *NT5C2*  
294 expression which starts during neurodevelopment and persists during adult life<sup>3</sup>.

295

296 Next, we assessed the sub-cellular distribution of *NT5C2* in hNPCs derived from human  
297 induced pluripotent stem cell (hiPSC) and CTX0E16 cells. First, we ectopically expressed a  
298 myc-tagged *NT5C2* construct in hiPSC-NPCs. This revealed that ectopic myc-*NT5C2* was  
299 abundantly expressed in the cell soma and was present in punctate structures along neurites  
300 (**Figure 2C**). We further confirmed the ability of our antibody raised against *NT5C2* to detect  
301 myc-*NT5C2* (**Supplementary Figure 4**). Next, we examined the distribution of *endogenous*  
302 *NT5C2* in hNPCs derived from hiPSCs (**Figure 2D**) and from the CTX0E16 cell line (**Figure**  
303 **2E**). Similar to the distribution of ectopic protein, endogenous *NT5C2* was found dispersed  
304 throughout the cell, and was present in punctate structures within the cell soma and along  
305 neurites; virtually all imaged cells expressed *NT5C2*. Taken together, these data suggest  
306 that *NT5C2* is highly expressed and ubiquitously distributed in hNPCs.

307

### 308 ***Reduced NT5C2 expression in hNPCs is associated with regulation of protein*** 309 ***translation***

310 In order to further understand how *NT5C2* function may impact on neurodevelopment and  
311 confer risk for psychiatric disorders, we investigated the effect of a loss of *NT5C2* function  
312 in these cells at the transcriptomic and molecular level. Specifically, we knocked down  
313 expression of *NT5C2* in hNPCs using an RNAi approach. CTX0E16 hNPCs were  
314 transfected using two independent, non-overlapping small interfering RNA (siRNA)  
315 sequences, A and B. The efficacy of the siRNA transfection was determined by uptake of a  
316 fluorescently labelled oligonucleotide (BLOCK-iT), which revealed a transfection rate of 90%  
317  $\pm$  0.02, relative to the total number of cells (n = 4 biological replicates per condition; **Figure**  
318 **3A**). Next, we assessed the extent of the knockdown on *NT5C2* expression elicited by a 72-  
319 hour incubation with siRNAs A and B, relative to the control cultures treated with a scramble  
320 sequence (**Figure 3B**). This analysis revealed that *NT5C2* expression was significantly

321 affected by siRNA treatment (One-way ANOVA,  $F(2, 8) = 13.45$ ,  $P = .003$ ). Tukey post hoc  
322 tests revealed a mean ~27% decrease in *NT5C2* expression in knockdown conditions  
323 (siRNA A:  $71.00 \pm 13.92$ ,  $P = .004$ ; siRNA B:  $75.10 \pm 7.29$ ,  $P = .004$ ). We assessed the  
324 ability of the siRNAs to knockdown the *NT5C2* protein in independent hNPC cultures (**Figure**  
325 **3C-D**). This analysis revealed a significant decrease in abundance of this protein in the  
326 knockdown conditions (One-way ANOVA,  $F(2, 41) = 12.23$ ,  $P < .001$ ; Tukey post hoc tests:  
327 siRNA A,  $58.79 \pm 34.74$ ,  $P < .001$ ; siRNA B,  $62.42 \pm 21.54$ ,  $P < .001$ ).

328

329 Transcriptomic analysis of the knockdown samples revealed that *NT5C2* siRNAs A and B  
330 elicited expression changes to 881 and 741 genes, respectively (linear regression, nominal  
331  $P < .05$ ; **Figures 3E and F**). To reduce off-target effects associated with individual siRNAs<sup>34</sup>,  
332 we identified the concordant transcriptomic effects *shared* between both siRNA treatments.  
333 This analysis revealed an overlap of 69 genes (**Figure 3G**), which is unlikely to occur by  
334 chance given the number of genes tagged in the microarray ( $n = 21,196$  genes; Fisher's  
335 exact test,  $P < .001$ , Jaccard index  $< .001$ , odds ratio = 2.6; gene list in **Supplementary**  
336 **Table 13**). This list was subdivided by directionality of effect, and the up- and downregulated  
337 network topologies were calculated using GeneMania<sup>28</sup> (**Supplementary Figure 5**). This  
338 analysis revealed multiple edges that indicate co-expression and co-localisation of  
339 genes/nodes in the networks, corroborating their functional association. The up- and  
340 downregulated gene lists were further analysed for enrichment of gene ontology (GO) terms,  
341 which revealed significantly downregulated terms ( $FDR < .05$ ) pertaining to the regulation of  
342 protein translation (GO:0015934 large ribosomal subunit; GO:0043624 cellular protein  
343 complex disassembly; GO:0000184 nonsense-mediated mRNA decay) and of the  
344 cytoskeleton (GO:0005200 structural constituent of the cytoskeleton; **Figure 3H**,  
345 **Supplementary Table 14**). The top upregulated GO term suggested the involvement of  
346 *NT5C2* in cell adhesion (GO:0005924 cell-substrate adherens junction), but this term did not

347 survive multiple testing correction ( $q > .05$ ). We used RT-qPCR to validate a panel of gene  
348 expression changes detected in the microarray analysis which are functionally related to the  
349 GO terms, to support their association with *NT5C2* (**Supplementary Figure 6**). These  
350 included changes to the heterogeneous nuclear ribonucleoprotein A1 (*HNRNPA1*), which is  
351 implicated in protein translation<sup>35</sup>; the proteasome 26S subunit, ATPase 4 (*PSMC4*),  
352 involved in protein degradation, cytoskeleton remodelling<sup>36</sup>, and Parkinson's disease<sup>37</sup>; and  
353 the autophagy-related cysteine peptidase gene (*ATG4B*), involved in cytoskeleton  
354 regulation<sup>38</sup>. Altogether, these findings support a risk mechanism for psychiatric disorders  
355 in hNPCs, in which decreased *NT5C2* expression causes global changes to protein  
356 translation.

357

### 358 ***NT5C2* regulates AMPK and ribosomal protein S6 (rpS6) phosphorylation**

359 Protein translation has been extensively implicated in psychiatric disorders<sup>39-41</sup>, but the  
360 mechanisms leading to disruptions in this process remain elusive. As our transcriptomic data  
361 indicated that reducing *NT5C2* expression could impact translation machinery, we were  
362 interested in investigating whether this could be associated with an alteration in protein  
363 translation. One mechanism via which *NT5C2* expression may impact protein translation is  
364 through AMPK signalling. For example, in glioblastoma cells, *NT5C2* has been shown to  
365 regulate this signalling cascade<sup>19</sup>. Interestingly, in neurons, AMPK is part of a signalling  
366 cascade that links extra cellular signals, including synaptic-activity, with the regulation of  
367 ribosomal activity, and thus protein synthesis under physiological conditions<sup>42</sup>. Altered  
368 AMPK signalling in neurodevelopmental disorders as well as in Alzheimer's Disease  
369 pathophysiology has also been linked with abnormal regulation of protein synthesis<sup>43, 44</sup>.  
370 Therefore, we tested whether knockdown of *NT5C2* resulted in abnormal AMPK signalling  
371 and in altered protein translation in hNPCs. We observed a significant effect of the *NT5C2*  
372 knockdown on total AMPK-alpha expression (Kruskal-Wallis test,  $H(3) = 12.23$ ,  $P < .001$ ); a

373 mean 132% increase in the abundance of this kinase (Dunn's post hoc tests: siRNA A, Mdn  
374 = 236.10,  $P = .002$ ; siRNA B, Mdn = 182.8,  $P = .017$ ; **Figure 4A**). In addition, we observed  
375 a significant effect of the knockdown on the level of phosphorylated AMPK-alpha (Thr172)  
376 (Kruskal-Wallis test,  $H(3) = 7.65$ ,  $P < .013$ ). The knockdown elicited a mean 55% increase  
377 in phosphorylated AMPK relative to control cultures (Dunn's post hoc tests: siRNA A, Mdn  
378 = 141.2,  $P = .033$ ; siRNA B, Mdn = 160.7,  $P = .033$ ; **Figure 4A**). These findings corroborate  
379 a functional association between *NT5C2* and AMPK signalling in hNPCs, and further  
380 suggest that this kinase pathway may be dysregulated in psychiatric disorders.

381

382 As AMPK signalling has been linked with the regulation of protein synthesis<sup>42-44</sup>, and owing  
383 to our transcriptomic data, we next tested whether the *NT5C2* knockdown had an effect on  
384 the phosphorylation of the ribosomal protein S6 (rpS6) at residues Ser235/Ser236.  
385 Assessment of rpS6 phosphorylation is widely used to monitor activation of *mammalian*  
386 *target of rapamycin complex 1* (mTORC1) signalling and can be used as a proxy to estimate  
387 protein translation in neurons<sup>45</sup>. Knockdown of *NT5C2* did not alter levels of total rpS6 levels  
388 (Kruskal-Wallis test,  $H(3) = 0.04$ ,  $P > .05$ ; **Figure 4B**). However, a significant increase in  
389 rpS6 phosphorylation was observed in knockdown conditions compared to the scramble-  
390 treated controls (Kruskal-Wallis test,  $H(3) = 8.22$ ,  $P = .002$ ). *NT5C2* knockdown elicited by  
391 siRNA A was significantly associated with a mean 23% increase in phosphorylated rpS6  
392 (Dunn's post hoc test, Mdn = 115.9,  $P = .012$ ; **Figure 4B**), whilst the knockdown with siRNA  
393 B elicited a mean 10% increase (Dunn's test, Mdn = 110.20,  $P = .09$ ; **Figure 4B**). These  
394 data suggest that *NT5C2* is a negative regulator of rpS6 phosphorylation and thus protein  
395 translation, in hNPCs.

396

397 To support the association between *NT5C2*, AMPK signalling and rpS6 activity, we carried  
398 out complementary experiments in HEK293T cells using a pNT5C2-myc overexpression



399 plasmid. Exogenous expression of *NT5C2* in HEK293T cells resulted in a mean ~64%  
400 decrease in phosphorylated AMPK-alpha (independent t-test; control:  $223.00 \pm 76.99$ ,  
401 overexpression:  $81.05 \pm 30.14$ ,  $t(15) = 4.88$ ,  $P < .001$ , Bonferroni corrected  $P < .001$ ; **Figure**  
402 **4C**), whilst no difference in total AMPK levels were observed ( $t(12) = 1.16$ ,  $P > .05$ ; **Figure**  
403 **4C**). These data are consistent with our data indicating that *NT5C2* is a negative regulator  
404 of AMPK signalling. Next, we examined levels of total and phosphorylated rpS6 in the  
405 presence or absence of ectopic *NT5C2*. This revealed a mean ~28% decrease in total rpS6  
406 abundance (control:  $159.10 \pm 48.52$ , overexpression:  $108.8 \pm 48.52$ ,  $t(16) = 2.88$ ,  $P = .011$ ,  
407 corrected  $P = .044$  ; **Figure 4C**), and a mean 300% increase in rpS6 phosphorylation  
408 (control:  $31.03 \pm 10.66$ , overexpression:  $124.10 \pm 8.20$ ,  $t(16) = 20.76$ ,  $P < .001$ , corrected  $P$   
409  $< .001$ ; **Figure 4C**). This effect of exogenous *NT5C2* on rpS6 phosphorylation was opposite  
410 to that observed in hNPCs, corroborating the complex nature of the intracellular cascades  
411 governing protein translation. Moreover, this could reflect different regulatory systems  
412 regulating protein translation in the different cell types. Ultimately, these data demonstrate  
413 that *NT5C2* regulates the function of components involved in the regulation of protein  
414 translation. These data suggest that risk alleles which decrease expression of *NT5C2* may  
415 confer risk to psychiatric disorders via changes to protein translation.

416

#### 417 **Knockdown of the *NT5C2* homologue *CG32549* in *D. melanogaster* is associated with** 418 **abnormal climbing behaviour**

419 Our *NT5C2* knockdown studies in hNPCs, together with the developmental profile of the  
420 gene in human brain (**Figure 2A**) support an important role for *NT5C2* in early brain  
421 development. However, these molecular studies do not afford an insight into the potential  
422 impact of reduced developmental expression of *NT5C2* at a systems level. Interestingly, the  
423 *NT5C2* protein shares 60.5% sequence identity and 80.2% sequence similarity with the *D.*  
424 *melanogaster* homologue, *CG32549* (**Supplementary Figure 7**), suggesting that they likely

425 exert the same or similar function. Thus, we reasoned that it would be possible to gain an  
426 insight into the functional impact of reduced *NT5C2* expression *in vivo*, by modelling the  
427 knockdown of *CG32549* on a complex and polygenic behaviour, such as climbing. This is a  
428 polygenic psychomotor trait driven by an interaction between cognitive function and physical  
429 activity, which is easily observable and measurable in *D. melanogaster*, and that has been  
430 previously used to study the functional impact of gene mutations in *D. melanogaster*<sup>29, 46</sup>,  
431 including those associated with psychiatric and neurodegenerative risk<sup>47</sup>.

432

433 To test the role of *CG32549* *in vivo*, three knockdown fly lines were engineered using the  
434 Gal4 upstream activating sequence (UAS-Gal4) system<sup>48</sup>, to artificially reduce *CG32549*  
435 expression either ubiquitously throughout the whole body, specifically in the central nervous  
436 system (CNS), or in the gut. This was achieved by crossing a *CG32549*-RNAi line with flies  
437 containing the GAL4-driven promoters of *ACT5C*, *ELAV*, or *GUT*, respectively (**Figure 5A**).  
438 The Gal4-UAS system is most active at 29°C<sup>49</sup>, and therefore crosses were incubated at  
439 this temperature from the pupal stage to elicit the strongest knockdown of *CG32549* at this  
440 point of development, when new neurons are still being formed<sup>50</sup>. Importantly, this allowed  
441 us to disentangle the potential function of *CG32549* in non-neuronal cells, such as muscles,  
442 which may influence performance in the negative geotaxis assay. The ubiquitous  
443 knockdown of *CG32549* was associated with reduced expression of this gene by 87% in the  
444 brain of flies with the ubiquitous knockdown (median, Mdn = 0.19) relative to flies without  
445 the RNAi cassette (Mdn = 1.00; Mann-Whitney test, two-tailed,  $U < .001$ ,  $P = .029$ ,  $n = 4$ ;  
446 **Figure 2A**). No difference in survival was observed across the different genotypes (Mann-  
447 Whitney test,  $P > .05$ ,  $n = 6$ ; **Figure 5C**). There was, however, a mean ~20% reduction in  
448 climbing success in flies with ubiquitous (Mdn = 0.78) and neuronal-specific knockdowns  
449 (Mdn = 0.88), relative to flies without the RNAi cassette (Mdn = 1.00; Mann-Whitney tests,  
450  $U < .001$ ,  $P = .002$  for both comparisons, Bonferroni corrected P-values = .006,  $n = 6$ ; **Figure**

451 **5C**). This effect was not observed in flies with knockdown of *CG32549* restricted to gut  
452 (Mann-Whitney test,  $P > .05$ ,  $n = 6$ ; **Figure 5C**). There was no difference in climbing  
453 impairment observed between flies with ubiquitous ( $80.00\% \pm 7.31$ ) or neuronal-specific  
454 knockdowns ( $85.41\% \pm 5.30$ ; One-way ANOVA,  $F(2, 15) = 16.58$ ,  $P < .001$ ,  $n = 6$  per  
455 condition; Tukey post hoc test  $P > .05$ ), although these effects significantly differed from that  
456 observed in flies with the gut-specific knockdown ( $97.62\% \pm 2.64$ ; gut vs. ubiquitous:  $P <$   
457  $.001$ ; gut vs. neuronal:  $P = .004$ ). Taken together, these results demonstrate the function of  
458 *NT5C2* at a systems level, implicating it in a complex, measurable phenotype in *D.*  
459 *melanogaster*.

460

## 461 **Discussion**

462 This study aimed to investigate the expression and function of *NT5C2* in the adult brain and  
463 in neural progenitor cells, and to characterise the biological mechanisms via which this gene  
464 governs risk for psychiatric disorders. Previously, we identified cis-regulatory mechanisms  
465 elicited by common psychiatric risk alleles on chromosome 10q24 reducing expression of  
466 *NT5C2* in the hippocampus, dorsolateral prefrontal cortex and nucleus caudate of population  
467 controls, and in the second trimester foetal brain<sup>3</sup>. Here, we observe that *NT5C2* expression  
468 is indeed decreased in the hippocampus of psychiatric patients, and our data from validated  
469 human cellular assays indicate that this may result in changes to protein translation in  
470 neurons. Whilst the effect of *NT5C2* on protein translation was observed in hNPCs (Figure  
471 5), where this protein is highly expressed and ubiquitously distributed (Figure 3), we  
472 hypothesise that this mechanism may also occur in the adult brain, although it may be  
473 susceptible to additional regulatory mechanisms. We further hypothesise that the psychiatric  
474 risk mechanism pertaining *NT5C2* expression in the adult brain is more likely to occur in  
475 neurons, where this protein is more expressed relative to glial cells (Figure 1). This is  
476 consistent with the recent suggestion that expression of psychiatric risk genes is cell-type

477 specific, with particular enrichment of neuronal cell type<sup>32</sup>. Ultimately, the association  
478 between *NT5C2* function and protein translation regulation corroborates the idea that this  
479 gene serves a fundamental role in cell biology, as it is implicated in a multitude of disease  
480 states<sup>1, 2, 4-9</sup>.

481

482 The transcriptomic analysis of the knockdown in hNPCs also revealed that *NT5C2* may  
483 govern genes that regulate the cytoskeleton (Figure 4). Changes to the cytoskeleton have  
484 been previously implicated in psychiatric disorders<sup>51</sup>, but these significantly depend on the  
485 translational machinery<sup>52</sup>. Protein translation is such a finely regulated process; it is in part  
486 modulated by AMPK signalling<sup>53-55</sup> and rpS6 activity<sup>45, 56, 57</sup>, and has been vastly implicated  
487 in psychiatric disorders<sup>39-41</sup>. Interestingly, AMPK has been linked to neuroprotection and  
488 aspects of neurodevelopment that are relevant to psychiatric disorders, such as axogenesis  
489 and bioenergetics<sup>58-60</sup>. rpS6 activity, in turn, has been associated with increased neuronal  
490 function, neuroplasticity, and modulation by antipsychotics (e.g. clozapine, haloperidol,  
491 olanzapine) and abuse drugs (e.g. cocaine, methamphetamine, and  
492 tetrahydrocannabinol)<sup>45</sup>. While it is possible that *NT5C2* modulates protein translation by  
493 binding directly to other members of the translation machinery<sup>61</sup>, our data suggest that  
494 AMPK signalling and rpS6 activity could be explored as tractable drug targets for psychiatric  
495 disorders. The knockdown of the fly homologue *CG32549* in *Drosophila* further implicates  
496 neuronal *NT5C2* expression in motility behaviour (**Figure 5**), corroborating the importance  
497 of this gene at a systems level. It is possible that this effect in motility is driven by changes  
498 to the rate of protein translation, as it has been demonstrated that abnormal AMPK and rpS6  
499 activation in *Drosophila* are associated with climbing impairments<sup>62, 63</sup>.

500

501 There are two main limitations to our study which should be acknowledged. First, our gene  
502 expression analysis of case-control differences is underpowered, especially when

503 considering the heterogeneity inherent to all psychiatric conditions. We partly addressed this  
504 issue by controlling for gene expression changes associated with the effect of  
505 demographics; this analysis could be further improved by significantly increasing sample  
506 size. Second, we obtained a modest knockdown in the loss-of-function experiment in  
507 hNPCs, which is likely due to the proliferative nature of these cells. We partly addressed this  
508 issue by testing hypotheses generated based on the microarray results using western  
509 blotting and a different cell type (HEK293T cells; **Figure 4**), which supported our findings.

510

511 Our results provide clues to the mechanism via which genetic variation affecting *NT5C2*  
512 expression may confer risk for psychiatric disorders. While functional studies *in vitro* or using  
513 model organisms cannot entirely capture the complex nature of these conditions, we  
514 anticipate that further work on this and other susceptibility genes may lead to the  
515 identification of converging risk mechanisms, which may reveal novel drug targets amenable  
516 for therapeutic intervention, or biomarkers for these conditions.

517

518

519 **Acknowledgements**

520 This work was supported by CAPES (Ministry of Education, Brazil, award no. BEX1279-13-  
521 0 to RRRD), an NIHR Maudsley Biomedical Research Centre Career Development Award  
522 (RRRD); the Medical Research Council UK (G0802166 to NJB; Skills Development  
523 Fellowship MR/N014863/1 to TRP; MR/N025377/1 to ACV; MR/L021064/1 to DPS) and  
524 MRC Centre grant (MR/N026063/1); the Wellcome Trust ISSF (097819 to DPS); the King's  
525 Health Partners Research and Development Challenge Fund, a fund administered on behalf  
526 of King's Health Partners by Guy's and St Thomas' Charity, Royal Society UK, Brain &  
527 Behavior Foundation (formally National Alliance for Research on Schizophrenia and  
528 Depression, NARSAD), the Psychiatric Research Trust (DPS); the European Union's  
529 Seventh Framework Programme (FP7-HEALTH-603016) (DPS); and US National Institutes  
530 of Health grants CA206488 and AI076059 (DFN). This study represents independent  
531 research part funded by the NIHR-Wellcome Trust King's Clinical Research Facility and the  
532 National Institute for Health Research (NIHR) Biomedical Research Centre at South London  
533 and Maudsley NHS Foundation Trust and King's College London. The views expressed are  
534 those of the authors and not necessarily those of the NHS, the NIHR or the Department of  
535 Health and Social Care. Tissue samples were supplied by The London Neurodegenerative  
536 Diseases Brain Bank, which receives funding from the MRC and as part of the Brains for  
537 Dementia Research programme, jointly funded by Alzheimer's Research UK and  
538 Alzheimer's Society. We thank Dr. Frank Hirth for constructive reading of the manuscript.

539

540 **Conflict of Interest**

541 GDB and ACV declare receiving funding from Ely Lilly and F. Hoffman La Roche,  
542 respectively. The other authors declare no conflict of interest.

543

544

545 **Authorship contribution**

546 Conceived and designed experiments: RRRD, DPS, NJB. Performed the experiments:  
547 RRRD, NDB, GAH, MCC. Analysed the data: RRRD, TRP. Contributed reagents, biological  
548 material, expertise: SHL, SS, IAW, CT, GDB, ACV, IE, DFN, RMM, NJB, TRP. Wrote the  
549 paper: RRRD, DPS.

550

551

552 **References**

- 553 1. Cross-Disorder Group of the Psychiatric Genomics Consortium. Identification of risk  
554 loci with shared effects on five major psychiatric disorders: a genome-wide analysis.  
555 *Lancet* 2013; 381(9875): 1371-1379.
- 556
- 557 2. Schizophrenia Working Group of the PGC. Biological insights from 108  
558 schizophrenia-associated genetic loci. *Nature* 2014; 511(7510): 421-427.
- 559
- 560 3. Duarte RRR, Troakes C, Nolan M, Srivastava DP, Murray RM, Bray NJ. Genome-  
561 wide significant schizophrenia risk variation on chromosome 10q24 is associated  
562 with altered cis-regulation of BORCS7, AS3MT, and NT5C2 in the human brain. *Am*  
563 *J Med Genet B Neuropsychiatr Genet* 2016; 171B: 806–814.
- 564
- 565 4. Darvish H, Azcona LJ, Tafakhori A, Ahmadi M, Ahmadifard A, Paisan-Ruiz C.  
566 Whole genome sequencing identifies a novel homozygous exon deletion in the  
567 NT5C2 gene in a family with intellectual disability and spastic paraplegia. *NPJ*  
568 *Genom Med* 2017; 2.
- 569
- 570 5. Nalls MA, Saad M, Noyce AJ, Keller MF, Schrag A, Bestwick JP *et al.* Genetic  
571 comorbidities in Parkinson’s disease. *Human molecular genetics* 2014; 23(3): 831-  
572 841.
- 573
- 574 6. Straussberg R, Onoufriadis A, Konen O, Zouabi Y, Cohen L, Lee JYW *et al.* Novel  
575 homozygous missense mutation in NT5C2 underlying hereditary spastic paraplegia  
576 SPG45. *Am J Med Genet A* 2017; 173(11): 3109-3113.



577

578 7. Schunkert H, König IR, Kathiresan S, Reilly MP, Assimes TL, Holm H *et al.* Large-  
579 scale association analysis identifies 13 new susceptibility loci for coronary artery  
580 disease. *Nature Genetics* 2011; 43: 333.

581

582 8. Newton-Cheh C, Johnson T, Gateva V, Tobin MD, Bochud M, Coin L *et al.*  
583 Genome-wide association study identifies eight loci associated with blood pressure.  
584 *Nat Genet* 2009; 41(6): 666-676.

585

586 9. Tzoneva G, Dieck CL, Oshima K, Ambesi-Impiombato A, Sanchez-Martin M,  
587 Madubata CJ *et al.* Clonal evolution mechanisms in NT5C2 mutant-relapsed acute  
588 lymphoblastic leukaemia. *Nature* 2018.

589

590 10. Itoh R. Enzymatic properties and physiological roles of cytosolic 5'-nucleotidase II.  
591 *Curr Med Chem* 2013; 20(34): 4260-4284.

592

593 11. Meyer JA, Wang J, Hogan LE, Yang JJ, Dandekar S, Patel JP *et al.* Relapse-  
594 specific mutations in NT5C2 in childhood acute lymphoblastic leukemia. *Nat Genet*  
595 2013; 45(3): 290-294.

596

597 12. Lindberg D, Shan D, Ayers-Ringler J, Oliveros A, Benitez J, Prieto M *et al.*  
598 Purinergic signaling and energy homeostasis in psychiatric disorders. *Curr Mol Med*  
599 2015; 15(3): 275-295.

600

- 601 13. Boison D. Modulators of nucleoside metabolism in the therapy of brain diseases.  
602 *Curr Top Med Chem* 2011; 11(8): 1068-1086.
- 603
- 604 14. Rapaport E, Garcia-Blanco MA, Zamecnik PC. Regulation of DNA replication in S  
605 phase nuclei by ATP and ADP pools. *Proc Natl Acad Sci U S A* 1979; 76(4): 1643-  
606 1647.
- 607
- 608 15. Tornroth-Horsefield S, Neutze R. Opening and closing the metabolite gate. *Proc*  
609 *Natl Acad Sci U S A* 2008; 105(50): 19565-19566.
- 610
- 611 16. Lara DR, Souza DO. Schizophrenia: a purinergic hypothesis. *Med Hypotheses*  
612 2000; 54(2): 157-166.
- 613
- 614 17. Omar B, Zmuda-Trzebiatowska E, Manganiello V, Goransson O, Degerman E.  
615 Regulation of AMP-activated protein kinase by cAMP in adipocytes: roles for  
616 phosphodiesterases, protein kinase B, protein kinase A, Epac and lipolysis. *Cell*  
617 *Signal* 2009; 21(5): 760-766.
- 618
- 619 18. Yin W, Mu J, Birnbaum MJ. Role of AMP-activated protein kinase in cyclic AMP-  
620 dependent lipolysis In 3T3-L1 adipocytes. *J Biol Chem* 2003; 278(44): 43074-  
621 43080.
- 622
- 623 19. Kulkarni SS, Karlsson HK, Szekeres F, Chibalin AV, Krook A, Zierath JR.  
624 Suppression of 5'-nucleotidase enzymes promotes AMP-activated protein kinase

- 625 (AMPK) phosphorylation and metabolism in human and mouse skeletal muscle. *J*  
626 *Biol Chem* 2011; 286(40): 34567-34574.
- 627
- 628 20. Kim S, Webster MJ. The Stanley Neuropathology Consortium Integrative Database:  
629 a Novel, Web-Based Tool for Exploring Neuropathological Markers in Psychiatric  
630 Disorders and the Biological Processes Associated with Abnormalities of Those  
631 Markers. *Neuropsychopharmacology* 2009; 35: 473.
- 632
- 633 21. Bolger AM, Lohse M, Usadel B. Trimmomatic: a flexible trimmer for Illumina  
634 sequence data. *Bioinformatics* 2014; 30(15): 2114-2120.
- 635
- 636 22. Bray NL, Pimentel H, Melsted P, Pachter L. Near-optimal probabilistic RNA-seq  
637 quantification. *Nat Biotechnol* 2016; 34(5): 525-527.
- 638
- 639 23. Love MI, Huber W, Anders S. Moderated estimation of fold change and dispersion  
640 for RNA-seq data with DESeq2. *Genome Biol* 2014; 15(12): 550.
- 641
- 642 24. Anderson GW, Deans PJ, Taylor RD, Raval P, Chen D, Lowder H *et al.*  
643 Characterisation of neurons derived from a cortical human neural stem cell line  
644 CTX0E16. *Stem Cell Res Ther* 2015; 6: 149.
- 645
- 646 25. Deans PJ, Raval P, Sellers KJ, Gatford NJ, Halai S, Duarte RR *et al.* Psychosis  
647 Risk Candidate ZNF804A Localizes to Synapses and Regulates Neurite Formation  
648 and Dendritic Spine Structure. *Biol Psychiatry* 2016.

649

650 26. Notter T, Panzanelli P, Pfister S, Mircsof D, Fritschy JM. A protocol for concurrent  
651 high-quality immunohistochemical and biochemical analyses in adult mouse central  
652 nervous system. *Eur J Neurosci* 2014; 39(2): 165-175.

653

654 27. Notter T, Coughlin JM, Gschwind T, Weber-Stadlbauer U, Wang Y, Kassiou M *et al.*  
655 Translational evaluation of translocator protein as a marker of neuroinflammation in  
656 schizophrenia. *Mol Psychiatry* 2018; 23(2): 323-334.

657

658 28. Warde-Farley D, Donaldson SL, Comes O, Zuberi K, Badrawi R, Chao P *et al.* The  
659 GeneMANIA prediction server: biological network integration for gene prioritization  
660 and predicting gene function. *Nucleic Acids Res* 2010; 38(Web Server issue):  
661 W214-220.

662

663 29. Gargano JW, Martin I, Bhandari P, Grotewiel MS. Rapid iterative negative geotaxis  
664 (RING): a new method for assessing age-related locomotor decline in *Drosophila*.  
665 *Exp Gerontol* 2005; 40(5): 386-395.

666

667 30. Zeisel A, Munoz-Manchado AB, Codeluppi S, Lonnerberg P, La Manno G, Jureus A  
668 *et al.* Brain structure. Cell types in the mouse cortex and hippocampus revealed by  
669 single-cell RNA-seq. *Science* 2015; 347(6226): 1138-1142.

670

671 31. Gonzalez-Burgos G, Cho RY, Lewis DA. Alterations in cortical network oscillations  
672 and parvalbumin neurons in schizophrenia. *Biol Psychiatry* 2015; 77(12): 1031-  
673 1040.

674

675 32. Skene NG, Bryois J, Bakken TE, Breen G, Crowley JJ, Gaspar HA *et al.* Genetic  
676 identification of brain cell types underlying schizophrenia. *Nat Genet* 2018; 50(6):  
677 825-833.

678

679 33. Kang HJ, Kawasawa YI, Cheng F, Zhu Y, Xu X, Li M *et al.* Spatio-temporal  
680 transcriptome of the human brain. *Nature* 2011; 478(7370): 483-489.

681

682 34. Hill MJ, Jeffries AR, Dobson RJ, Price J, Bray NJ. Knockdown of the psychosis  
683 susceptibility gene ZNF804A alters expression of genes involved in cell adhesion.  
684 *Hum Mol Genet* 2012; 21(5): 1018-1024.

685

686 35. Kim HJ, Kim NC, Wang YD, Scarborough EA, Moore J, Diaz Z *et al.* Mutations in  
687 prion-like domains in hnRNPA2B1 and hnRNPA1 cause multisystem proteinopathy  
688 and ALS. *Nature* 2013; 495(7442): 467-473.

689

690 36. Jung S, Chung Y, Oh YJ. Breaking down autophagy and the Ubiquitin Proteasome  
691 System. *Parkinsonism Relat Disord* 2017.

692

693 37. Molochnikov L, Rabey JM, Dobronevsky E, Bonucelli U, Ceravolo R, Frosini D *et al.*  
694 A molecular signature in blood identifies early Parkinson's disease. *Mol*  
695 *Neurodegener* 2012; 7: 26.

696

- 697 38. Ramkumar A, Murthy D, Raja DA, Singh A, Krishnan A, Khanna S *et al.* Classical  
698 autophagy proteins LC3B and ATG4B facilitate melanosome movement on  
699 cytoskeletal tracks. *Autophagy* 2017; 13(8): 1331-1347.  
700
- 701 39. Swanger SA, Bassell GJ. Dendritic protein synthesis in the normal and diseased  
702 brain. *Neuroscience* 2013; 232: 106-127.  
703
- 704 40. Darby MM, Yolken RH, Sabunciyan S. Consistently altered expression of gene sets  
705 in postmortem brains of individuals with major psychiatric disorders. *Translational*  
706 *Psychiatry* 2016; 6: e890.  
707
- 708 41. English JA, Fan Y, Föcking M, Lopez LM, Hryniewiecka M, Wynne K *et al.* Reduced  
709 protein synthesis in schizophrenia patient-derived olfactory cells. *Translational*  
710 *Psychiatry* 2015; 5(10): e663.  
711
- 712 42. Kenney JW, Sorokina O, Genheden M, Sorokin A, Armstrong JD, Proud CG.  
713 Dynamics of elongation factor 2 kinase regulation in cortical neurons in response to  
714 synaptic activity. *J Neurosci* 2015; 35(7): 3034-3047.  
715
- 716 43. Ma T, Chen Y, Vingtdeux V, Zhao H, Viollet B, Marambaud P *et al.* Inhibition of  
717 AMP-activated protein kinase signaling alleviates impairments in hippocampal  
718 synaptic plasticity induced by amyloid beta. *J Neurosci* 2014; 34(36): 12230-12238.  
719

- 720 44. Steinmetz AB, Stern SA, Kohtz AS, Descalzi G, Alberini CM. Insulin-Like Growth  
721 Factor II Targets the mTOR Pathway to Reverse Autism-Like Phenotypes in Mice. *J*  
722 *Neurosci* 2018; 38(4): 1015-1029.
- 723
- 724 45. Biever A, Valjent E, Puighermanal E. Ribosomal Protein S6 Phosphorylation in the  
725 Nervous System: From Regulation to Function. *Front Mol Neurosci* 2015; 8: 75.
- 726
- 727 46. Toma DP, White KP, Hirsch J, Greenspan RJ. Identification of genes involved in  
728 *Drosophila melanogaster* geotaxis, a complex behavioral trait. *Nature Genetics*  
729 2002; 31: 349.
- 730
- 731 47. Calcagno B, Eyles D, van Alphen B, van Swinderen B. Transient activation of  
732 dopaminergic neurons during development modulates visual responsiveness,  
733 locomotion and brain activity in a dopamine ontogeny model of schizophrenia.  
734 *Transl Psychiatry* 2013; 3: e206.
- 735
- 736 48. Brand AH, Perrimon N. Targeted gene expression as a means of altering cell fates  
737 and generating dominant phenotypes. *Development* 1993; 118(2): 401-415.
- 738
- 739 49. Duffy JB. GAL4 system in *Drosophila*: a fly geneticist's Swiss army knife. *Genesis*  
740 2002; 34(1-2): 1-15.
- 741
- 742 50. Truman JW, Bate M. Spatial and temporal patterns of neurogenesis in the central  
743 nervous system of *Drosophila melanogaster*. *Dev Biol* 1988; 125(1): 145-157.

744

745 51. Fukuda T, Yanagi S. Psychiatric behaviors associated with cytoskeletal defects in  
746 radial neuronal migration. *Cell Mol Life Sci* 2017; 74(19): 3533-3552.

747

748 52. Silva RC, Sattlegger E, Castilho BA. Perturbations in actin dynamics reconfigure  
749 protein complexes that modulate GCN2 activity and promote an eIF2 response.  
750 *Journal of Cell Science* 2016; 129(24): 4521-4533.

751

752 53. Chan AY, Soltys CL, Young ME, Proud CG, Dyck JR. Activation of AMP-activated  
753 protein kinase inhibits protein synthesis associated with hypertrophy in the cardiac  
754 myocyte. *J Biol Chem* 2004; 279(31): 32771-32779.

755

756 54. Reiter AK, Bolster DR, Crozier SJ, Kimball SR, Jefferson LS. AMPK represses TOP  
757 mRNA translation but not global protein synthesis in liver. *Biochem Biophys Res  
758 Commun* 2008; 374(2): 345-350.

759

760 55. Bolster DR, Crozier SJ, Kimball SR, Jefferson LS. AMP-activated protein kinase  
761 suppresses protein synthesis in rat skeletal muscle through down-regulated  
762 mammalian target of rapamycin (mTOR) signaling. *J Biol Chem* 2002; 277(27):  
763 23977-23980.

764

765 56. Mihaylova MM, Shaw RJ. The AMP-activated protein kinase (AMPK) signaling  
766 pathway coordinates cell growth, autophagy, & metabolism. *Nature cell biology*  
767 2011; 13(9): 1016-1023.

768



- 769 57. Kim J, Kundu M, Viollet B, Guan K-L. AMPK and mTOR regulate autophagy  
770 through direct phosphorylation of Ulk1. *Nat Cell Biol* 2011; 13(2): 132-141.
- 771
- 772 58. Williams T, Courchet J, Viollet B, Brenman JE, Polleux F. AMP-activated protein  
773 kinase (AMPK) activity is not required for neuronal development but regulates  
774 axogenesis during metabolic stress. *Proceedings of the National Academy of  
775 Sciences* 2011; 108(14): 5849-5854.
- 776
- 777 59. Favre G, Banta Lavenex P, Lavenex P. Developmental regulation of expression of  
778 schizophrenia susceptibility genes in the primate hippocampal formation.  
779 *Translational Psychiatry* 2012; 2(10): e173.
- 780
- 781 60. Ronnett GV, Ramamurthy S, Kleman AM, Landree LE, Aja S. AMPK in the Brain:  
782 Its Roles in Energy Balance and Neuroprotection. *Journal of neurochemistry* 2009;  
783 109(Suppl 1): 17-23.
- 784
- 785 61. Zhou Y, Dong F, Lanz TA, Reinhart V, Li M, Liu L *et al.* Interactome analysis  
786 reveals ZNF804A, a schizophrenia risk gene, as a novel component of protein  
787 translational machinery critical for embryonic neurodevelopment. *Mol Psychiatry*  
788 2017.
- 789
- 790 62. Ng CH, Guan MS, Koh C, Ouyang X, Yu F, Tan EK *et al.* AMP kinase activation  
791 mitigates dopaminergic dysfunction and mitochondrial abnormalities in *Drosophila*  
792 models of Parkinson's disease. *J Neurosci* 2012; 32(41): 14311-14317.
- 793

794 63. Kim M, Semple I, Kim B, Kiers A, Nam S, Park HW *et al.* Drosophila Gyf/GRB10  
 795 interacting GYF protein is an autophagy regulator that controls neuron and muscle  
 796 homeostasis. *Autophagy* 2015; 11(8): 1358-1372.

797

798

799

800

801

802

803

804

805

## Figures

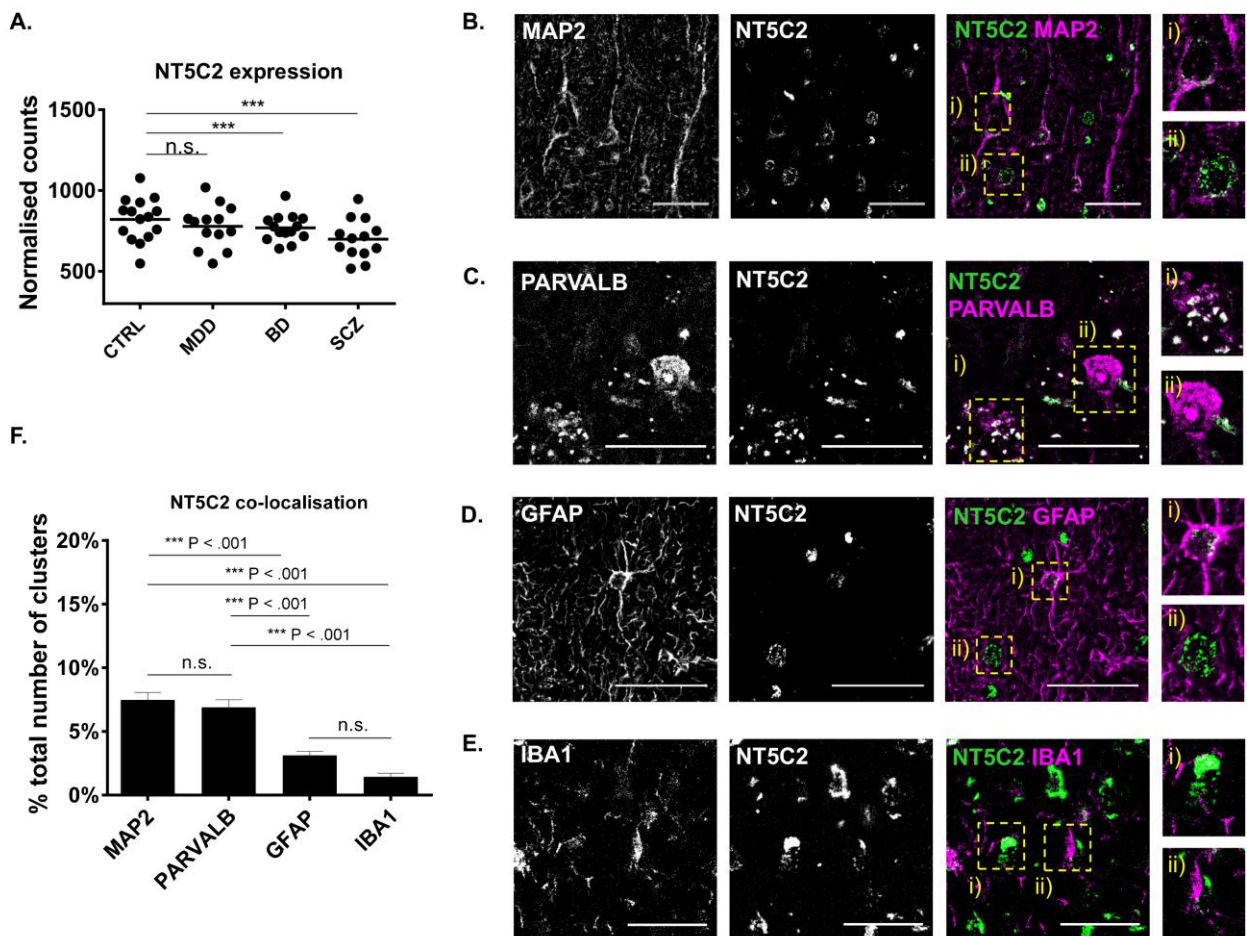

806

807 **Figure 1. Expression of the psychiatric risk gene in patients, and distribution of the**  
808 **encoded protein in unaffected controls. (A)** *NT5C2* is downregulated in the hippocampus  
809 of bipolar disorder and schizophrenia patients (Wald tests,  $q < .001$ ) **(B)** Co-localisation of  
810 *NT5C2* staining with MAP2 (neuronal marker), **(C)** PARVALB (interneuron marker), **(D)**  
811 GFAP (glial marker), **(E)** and IBA1 (microglia marker). Scale bars are 50  $\mu$ M. **(F)**  
812 Quantification of the co-localisation of *NT5C2* with markers from **B** to **E** revealed a significant  
813 difference in the co-localisation of *NT5C2* with these markers (one-way ANOVA,  $P < .001$ ,  
814 Tukey post hoc tests:  $***P < .001$  for all comparisons).  
815  
816

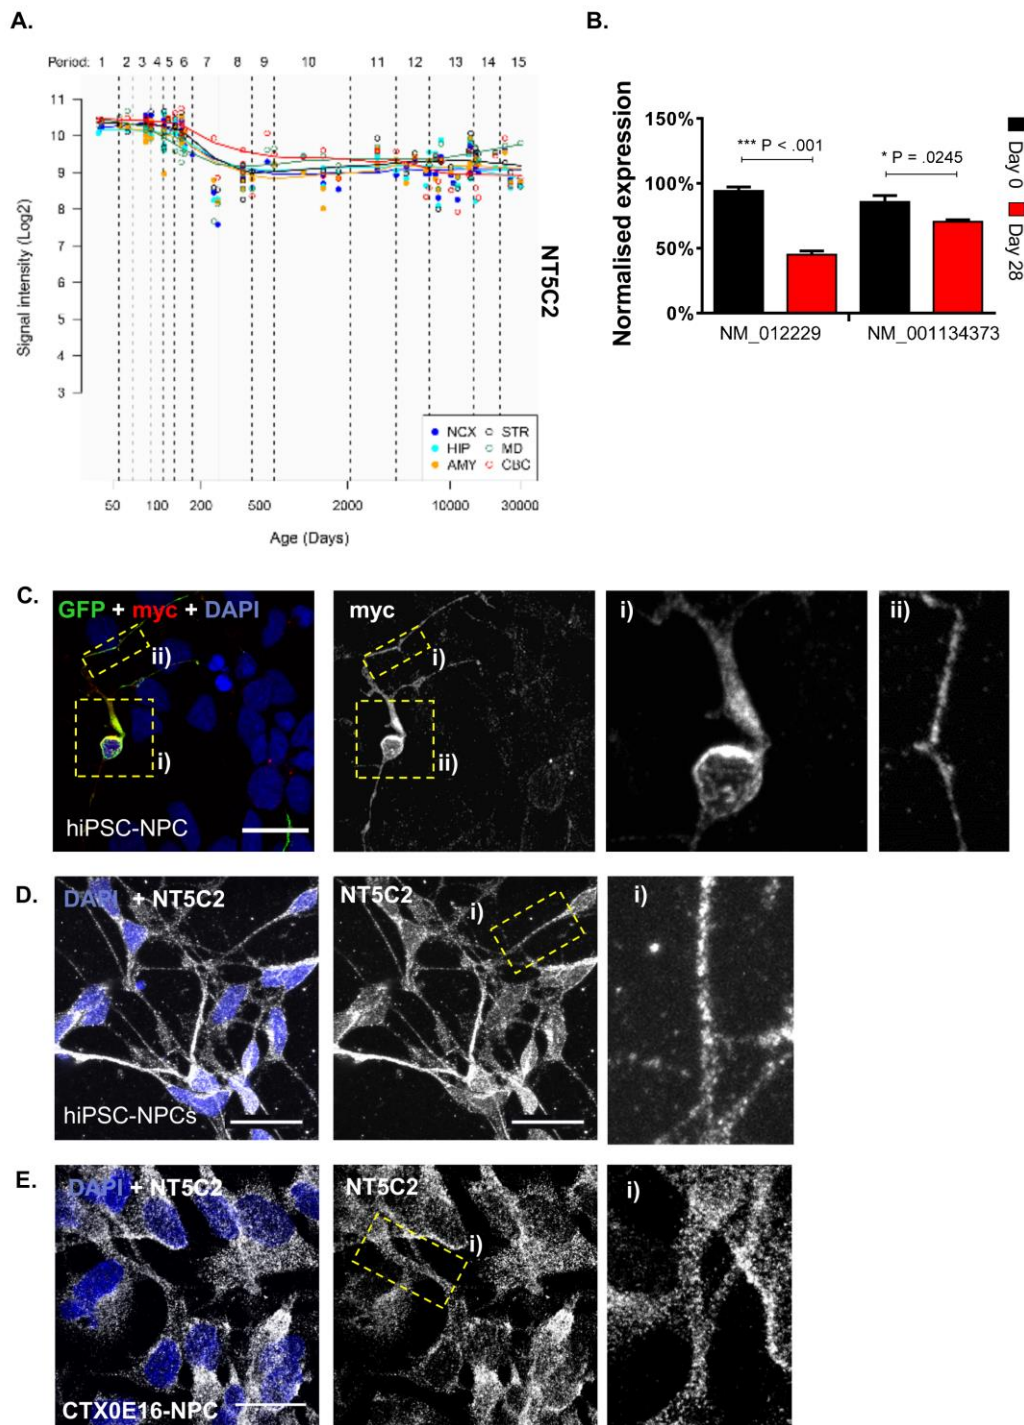

817

818 **Figure 2. Neurodevelopmental expression of *NT5C2*, and protein distribution in**  
 819 **human neural progenitor cells. (A)** Neural expression of *NT5C2* across human  
 820 development, according to the Human Brain Transcriptome Atlas<sup>33</sup>, showing that expression  
 821 peaks during foetal development. **(B)** The expression of *NT5C2* RefSeq transcripts  
 822 NM\_012229 and NM\_001134373 in hNPCs (Day 0) and immature neurons differentiated  
 823 from this source for 28 days. Expression is significantly higher at the neural progenitor state

824 relative to the later stage of differentiation (independent sample t-tests: \*\*\*P < .001, \*P <  
825 .05). **(C)** Distribution of ectopic NT5C2 was assessed by transfecting hNPCs with pNT5C2-  
826 myc and peGFP plasmids, followed by immunolabelling using antibodies raised against myc  
827 or GFP. GFP expression was used as morphological marker to outline cell morphology.  
828 Exogenous protein expression was observed along the cell soma and neurites. **(D)**  
829 Subcellular localisation of endogenous NT5C2 in hNPCs derived from a hiPSC line, or **(E)**  
830 or from the CTX0E16 cell line. In both hNPC systems, NT5C2 demonstrated a similar  
831 distribution pattern, suggesting this protein is ubiquitously distributed in neural progenitor  
832 cells. Scale bars are 20  $\mu$ M.

833

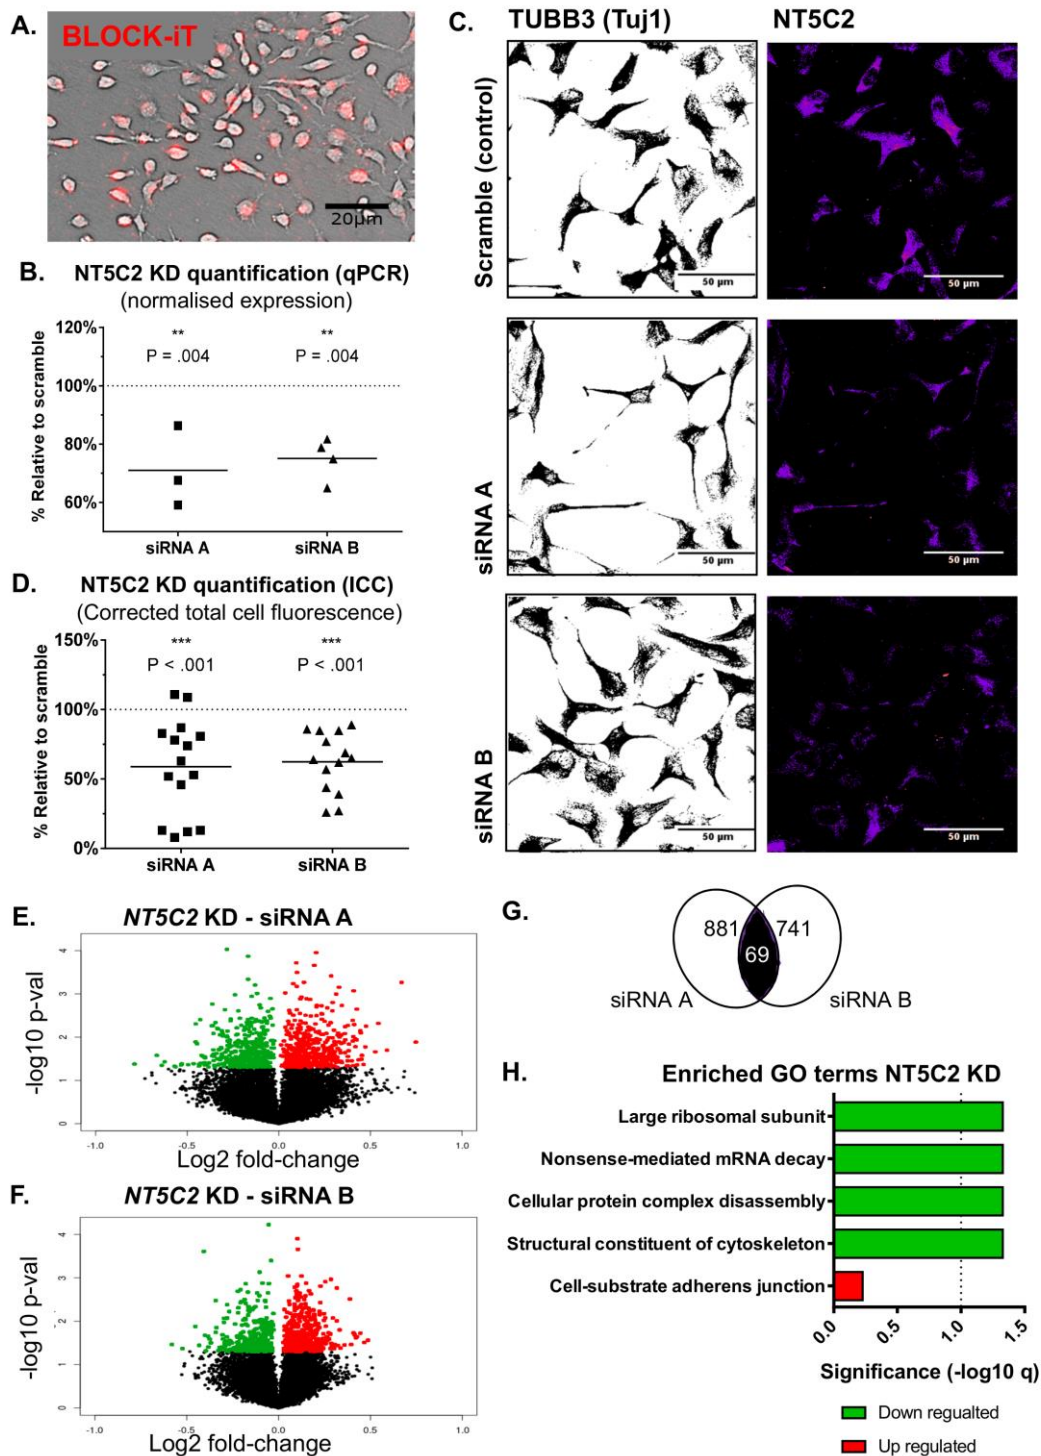

834

835 **Figure 3. Knockdown of *NT5C2* in hNPCs elicits transcriptomic changes associated**  
 836 **with protein translation. (A)** The efficacy of the siRNA transfection was determined by  
 837 uptake of BLOCK-iT, a fluorescently labelled oligonucleotide. Over 90% of cells contained  
 838 this reagent after incubation with this reagent for 72 hrs. **(B)** NT5C2 expression was  
 839 significantly reduced in knockdown cultures (one-way ANOVA, Tukey post hoc tests, \*\*P <  
 840 .01). **(C, D)** The ability of the siRNA treatments to significantly reduce NT5C2 expression in

841 hNPCs, at the protein level (one-way ANOVA, Tukey post hoc tests, \*\*\*P < .001). **(E)**  
842 Volcano plots indicating nominally significant transcriptomic changes elicited by siRNA A,  
843 and **(F)** siRNA B; **(G)** Venn diagrams indicates number of common genes differentially  
844 regulated by siRNA A and B. The overlap is significant according to a Fisher's exact test (P  
845 < .001). **(H)** Gene ontology terms enriched within the genes concordantly and differentially  
846 expressed in both knockdown conditions. The line indicates the significance threshold (-  
847  $\log_{10}(q < .05)$ ).

848

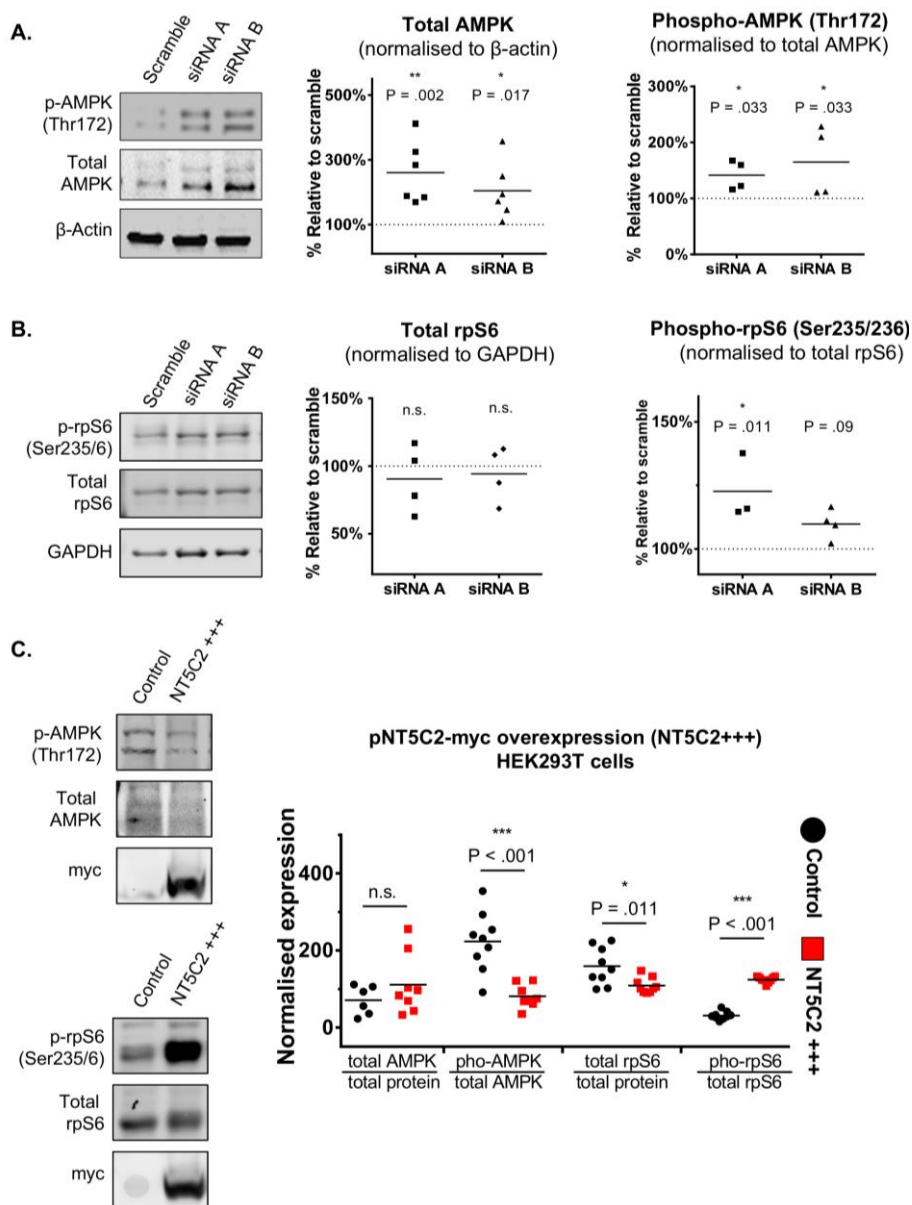

849

850 **Figure 4. NT5C2 regulates AMPK signalling and rpS6 activity. (A)** *NT5C2* knockdown  
 851 elicited a mean 132% increase in total AMPK- $\alpha$  levels (Kruskal-Wallis test, Dunn's post  
 852 hoc tests,  $**P < .01$ ,  $*P < .05$ ), and in phosphorylated AMPK- $\alpha$  (Thr172) in hNPCs ( $*P <$   
 853  $.05$ ). **(B)** Knockdown of *NT5C2* did not elicit changes to total rpS6 in hNPCs ( $P > .05$ ); there  
 854 was, however, an effect on phosphorylated rpS6 (Ser235/Ser236) levels, whereby siRNA A  
 855 elicited a mean 23% increase (Kruskal-Wallis test, Dunn's test,  $*P < .05$ ), and siRNA B a  
 856 modest mean 10% increase, which was not significant after correction (Dunn's test,  $P = .09$ ).  
 857 **(C)** The overexpression of *NT5C2* in HEK293T cells causes a significant decrease in  
 858 phosphorylated AMPK- $\alpha$  levels and in total rpS6, and a significant increase in  
 859 phosphorylated rpS6 (independent t-test,  $***P < .001$ ,  $*P = .01$ ).



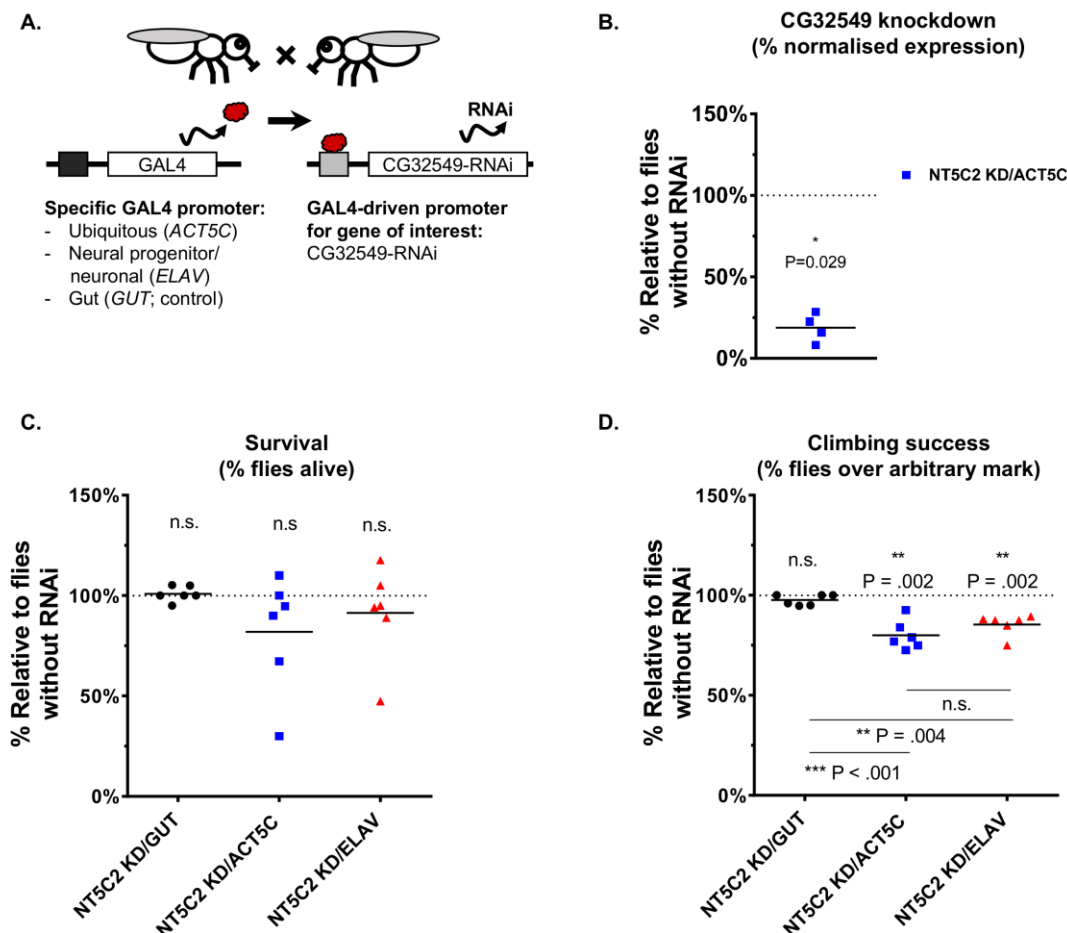

860

861 **Figure 5.** The knockdown of *CG32549* (*NT5C2* homologue) in *D. melanogaster* elicited by  
 862 RNAi directed ubiquitously (*ACT5C*), in gut (*GUT*), or in neural progenitor cells/neurons  
 863 (*ELAV*). **(A)** Schematic representation of the knockdown using the GAL4/UAS system. **(B)**  
 864 *CG32549* was less expressed in the brain of knockdown flies (Mann-Whitney test, \* $P < .05$ ).  
 865 **(C)** The knockdown did not significantly affect survival measured 17-20 days after eclosure  
 866 (Mann-Whitney test,  $P > .05$ ). **(D)** Climbing impairment observed in flies where knockdown  
 867 occurred ubiquitously or in neurons (Mann-Whitney tests, \*\* $P < .01$ ), but not in gut ( $P > .05$ ).  
 868 There was no difference in the climbing impairments observed between flies with ubiquitous  
 869 or neuronal-specific knockdowns (one-way ANOVA, Tukey post hoc test,  $P > .05$ ), although  
 870 these effects significantly differed from that observed in flies with the gut-specific knockdown  
 871 (Tukey tests: gut vs. ubiquitous: \*\*\* $P < .001$ ; gut vs. neuronal: \*\* $P < .01$ )

872
